# Supplementary material for: Loss of pyruvate kinase M2 limits growth and triggers innate immune signaling in endothelial cells
Source: PubMed Central journal article supplement (PMC6177464; doi:10.1038/s41467-018-06406-8), 2018-10-09
Supplement: 41467_2018_6406_MOESM1_ESM.pdf [file 41467_2018_6406_MOESM1_ESM.pdf]

## Supplementary Information

Loss of Pyruvate Kinase M2 limits growth and triggers innate immune signaling in endothelial cells.

**Stone et al.**

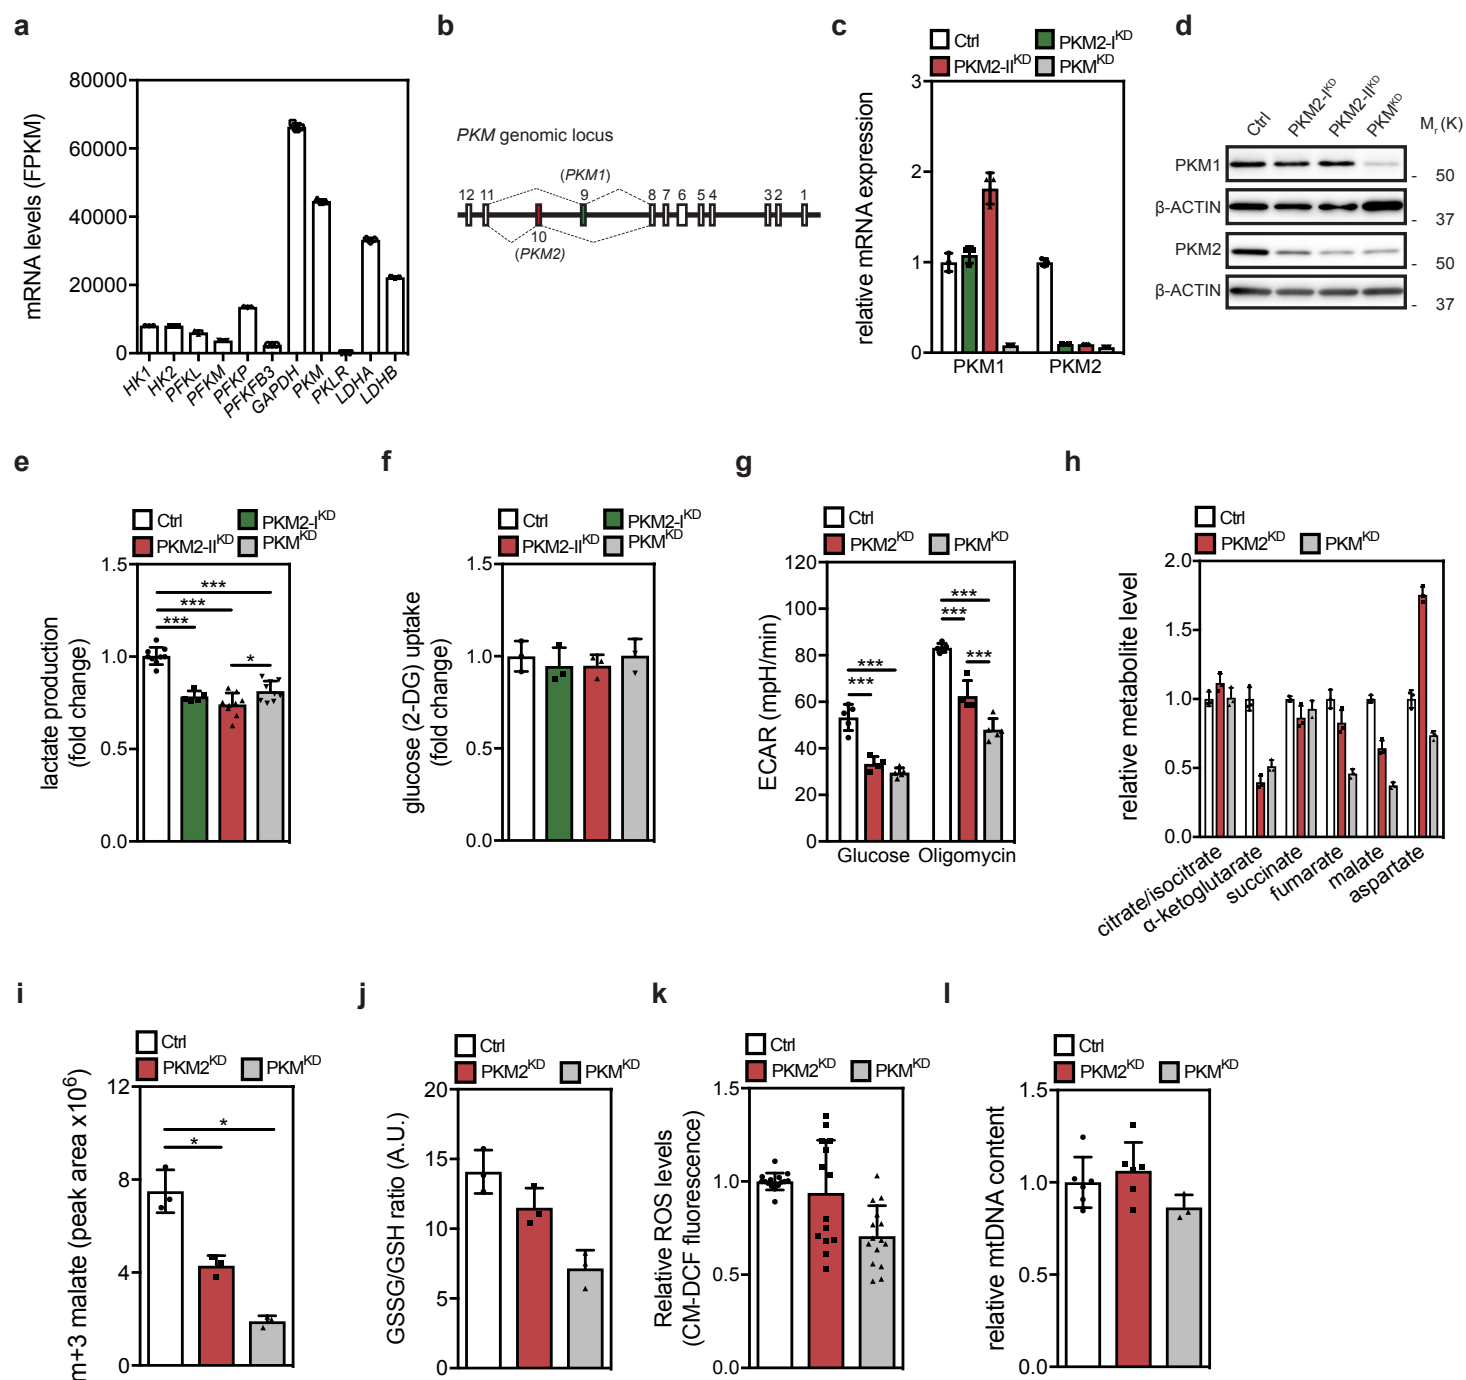

### Supplementary Figure 1: PKM2 silencing alters mitochondrial metabolism.

(a) mRNA levels for selected glycolytic enzymes in HUVECs (RNA-seq analyses on control HUVECs (FPKM - fragments per kilobase of transcript per million mapped reads)). (b) Schematic representation illustrating alternative splicing of the human *PKM* gene, leading to the inclusion of either exon 9 (*PKM1*) or exon 10 (*PKM2*). siRNA duplexes were used to specifically target *PKM2* mRNA (exon 10) or all *PKM* transcripts (exon 4, leading to the silencing of *PKM1* and *PKM2* expression). (c) RT-qPCR analysis of *PKM1* and *PKM2* mRNA expression showing specific knockdown of the relevant transcripts using siRNA duplexes specific to *PKM2* or pan-*PKM* in ECs (n=3). (d) Western blot analysis of *PKM1* and *PKM2* expression in HUVECs treated with the indicated siRNA duplexes. (e) Relative lactate levels in control, *PKM2-I<sup>KD</sup>*, *PKM2-II<sup>KD</sup>* and *PKM<sup>KD</sup>* ECs (n=9). (f) Glucose uptake in control, *PKM2-I<sup>KD</sup>*, *PKM2-II<sup>KD</sup>* and *PKM<sup>KD</sup>* ECs (n=3). (g) Extracellular acidification rate (ECAR) in cells treated with or without oligomycin, showing basal and maximal glycolytic rate in control, *PKM2<sup>KD</sup>* and *PKM<sup>KD</sup>* ECs (n=5). (h) Relative levels of TCA cycle intermediates in control, *PKM2<sup>KD</sup>* and *PKM<sup>KD</sup>* ECs (n=3). (i) Incorporation of [U-<sup>13</sup>C<sub>6</sub>]-glucose into m+3 malate in control, *PKM2<sup>KD</sup>* and *PKM<sup>KD</sup>* ECs (n=3). (j) Ratio of glutathione to oxidized glutathione in control, *PKM2<sup>KD</sup>* and *PKM<sup>KD</sup>* ECs (n=3). (k) Relative ROS levels in control, *PKM2<sup>KD</sup>* and *PKM<sup>KD</sup>* ECs (n=14). (l) Relative mitochondrial DNA content in control, *PKM2<sup>KD</sup>* and *PKM<sup>KD</sup>* ECs (n=3). a, c, e-l data represent means  $\pm$  s.d. (\*\*\*)  $P < 0.001$ , \*  $P < 0.05$  by one-way analysis of variance (ANOVA) followed by Tukey's HSD test).

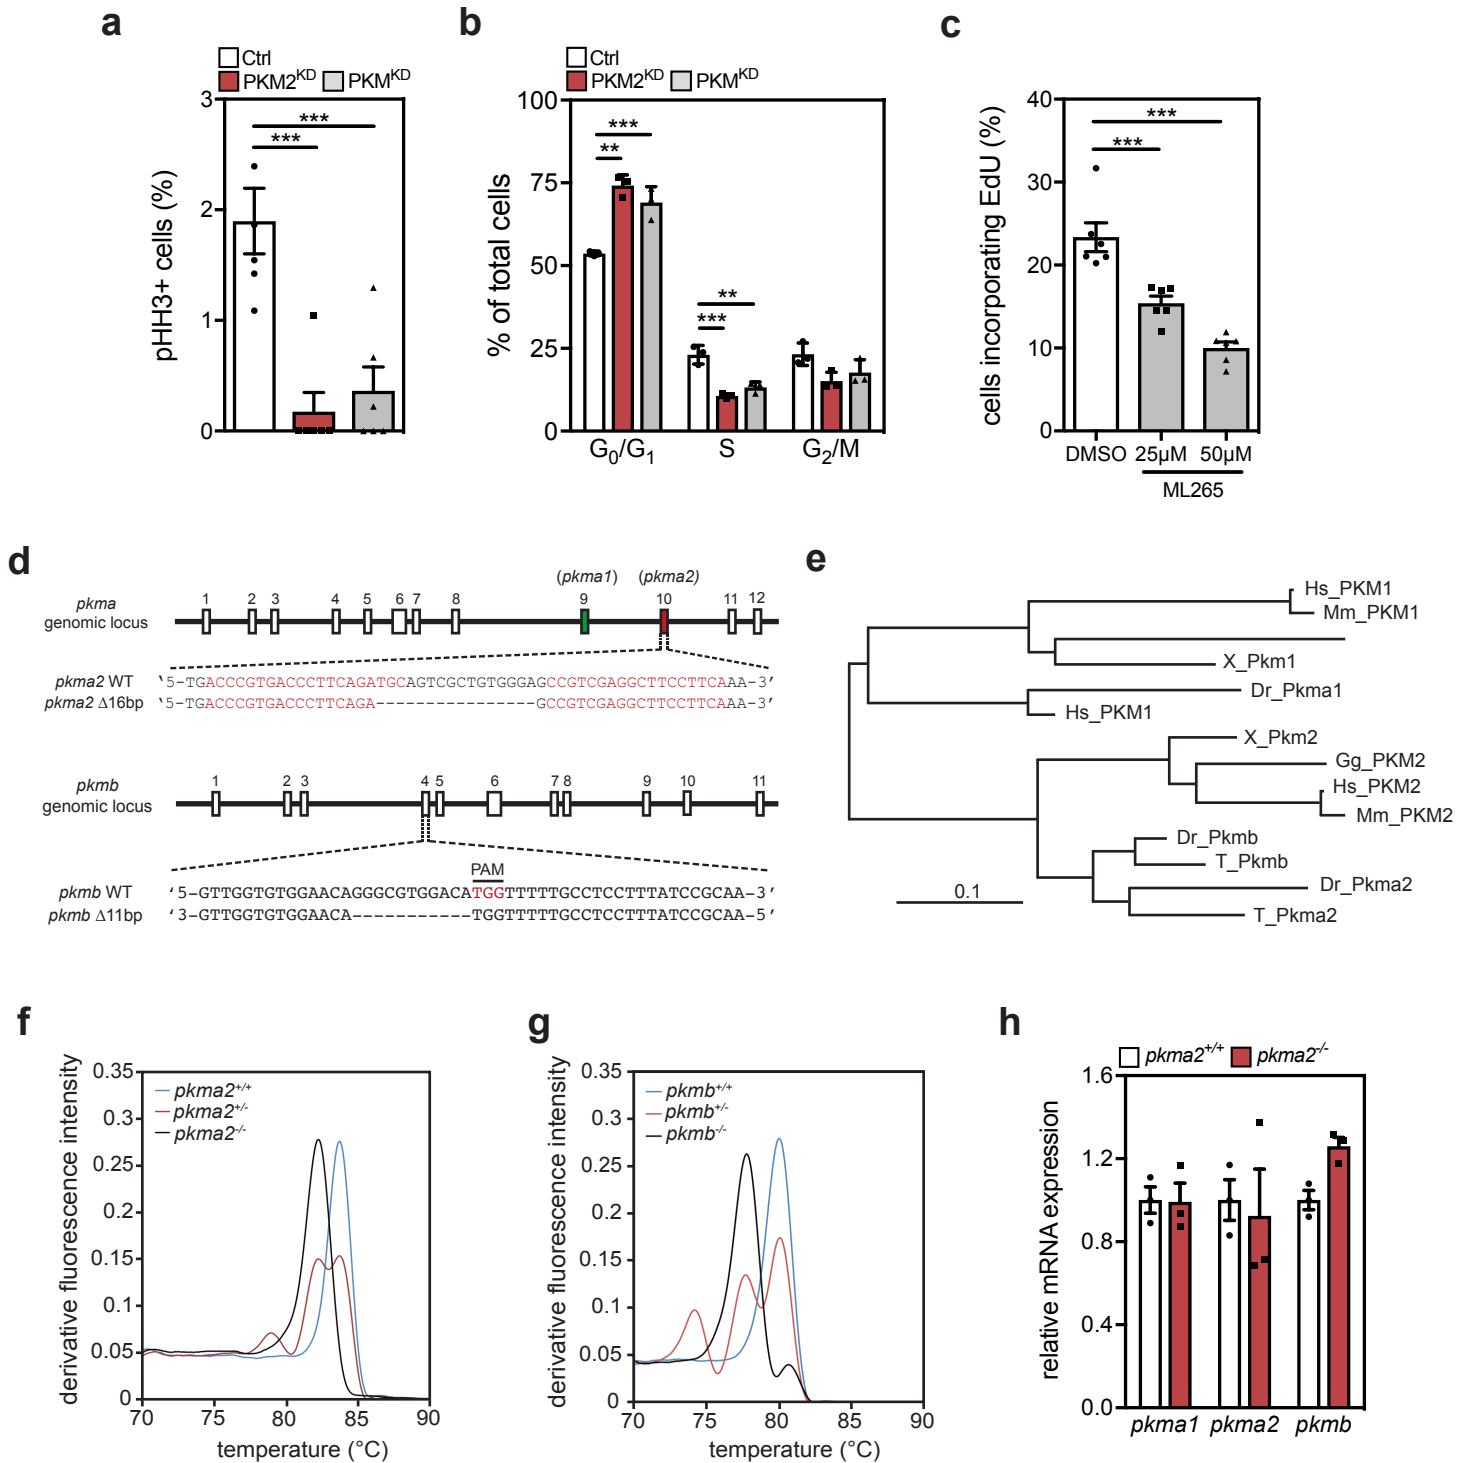

### Supplementary Figure 2: *In vitro* analysis of endothelial growth and zebrafish loss-of-function models.

(a) Quantification of phospho-Histone H3 positive cell numbers in control, PKM2<sup>KD</sup> and PKM<sup>KD</sup> ECs (n=6). (b) Flow cytometry analysis of cell cycle in propidium iodide stained control, PKM2<sup>KD</sup> and PKM<sup>KD</sup> ECs (n=3). (c) Quantification of EdU positive cell numbers in DMSO and ML265 treated ECs (n=6). (d) Genomic loci of the zebrafish *pkma* and *pkmb* genes, sequences targeted using TALEN (*pkma2*) or CRISPR (*pkmb*) and the recovered lesions. (e) Clustering analysis based on a 56 amino acid sequence from each of the indicated proteins, which displays homology to the amino acids encoded by either exon 9 or 10 of the human *PKM* gene (Hs - Human, Mm - Mouse, X - *Xenopus*, Dr - Zebrafish, Gg - Chicken). High resolution melt analysis (HRMA) genotyping of *pkma2* (f) and *pkmb* (g) mutant zebrafish alleles. (h) mRNA expression levels of zebrafish *pkm* transcripts in *pkma2*<sup>+/+</sup> and *pkma2*<sup>-/-</sup> embryos at 26 hpf. a, c, h data represent means ± s.e.m. b data represent means ± s.d. (\*\*\*)P < 0.001, \*\*P < 0.01 by one-way analysis of variance (ANOVA) followed by Tukey's HSD test.

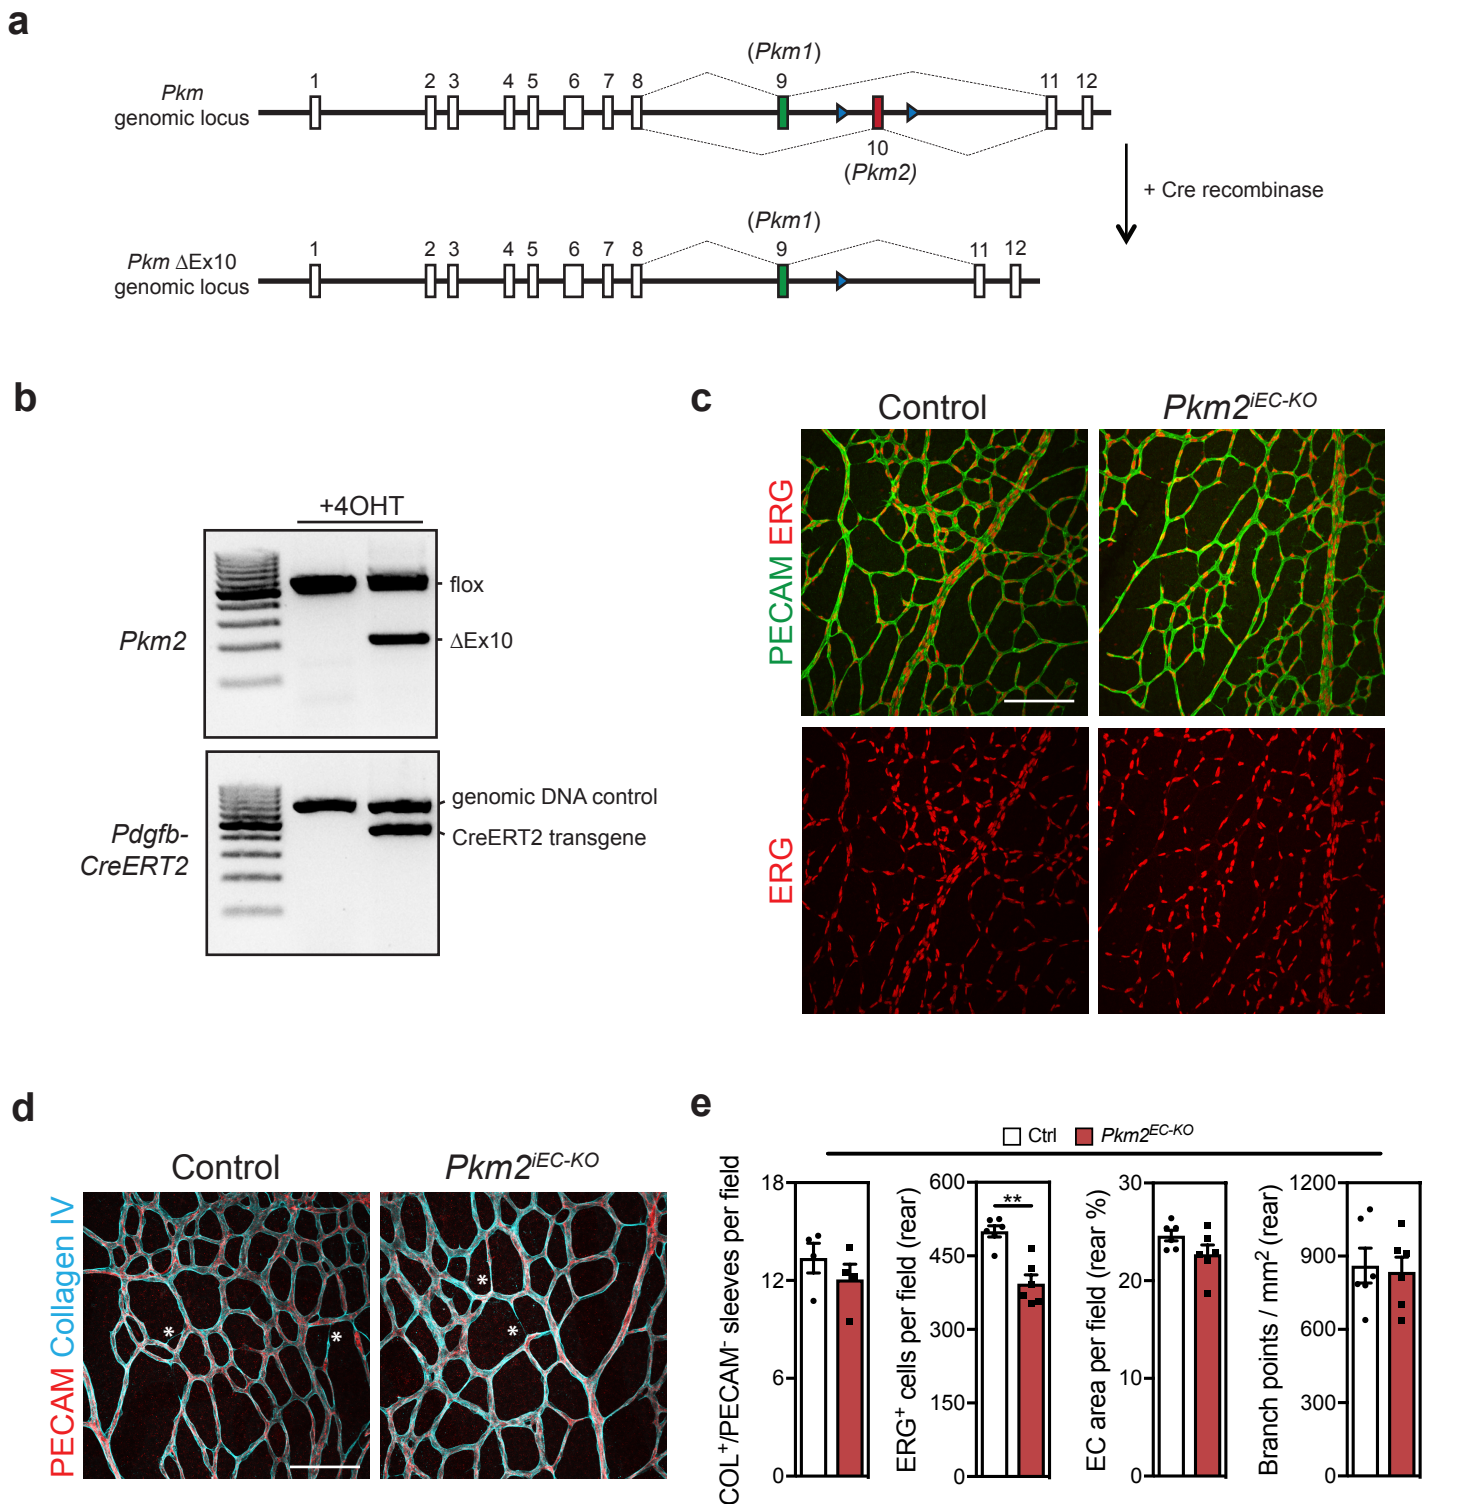

### Supplementary Figure 3: Endothelial specific deletion of *Pkm2* in the post-natal mouse retina.

(a) Schematic representation illustrating alternative splicing of the mouse *Pkm* gene, leading to the inclusion of either exon 9 (*Pkm1*) or exon 10 (*Pkm2*), blue arrows indicate loxP sites in *Pkm<sup>tm1.1Mg<sup>vh</sup></sup>* mutant mice and below is a schematic representation of the recombined locus. (b) PCR from genomic DNA of P7 *Pkm2<sup>fl/fl</sup>* mice showing efficient 4-OHT induced recombination of exon 10 from the *Pkm* gene in mice carrying (right) the *Pdgfb-CreERT2* transgene. (c) Representative confocal projections of central plexus vessels in PECAM and ERG stained retinas from control and *Pkm2<sup>iEC-KO</sup>* mice. (d) Representative confocal projections of central plexus vessels in PECAM and Collagen IV stained retinas from control and *Pkm2<sup>iEC-KO</sup>* mice. (e) Quantification of Collagen IV<sup>+</sup>/PECAM<sup>+</sup> sleeves, ERG<sup>+</sup> ECs, EC area per field and branch point density at the angiogenic front of control and *Pkm2<sup>iEC-KO</sup>* mice (n=6). e data represent means ± s.e.m. (\*\*P < 0.01 by by two tailed students t-test) Scale bars in c and d = 100μm.

a

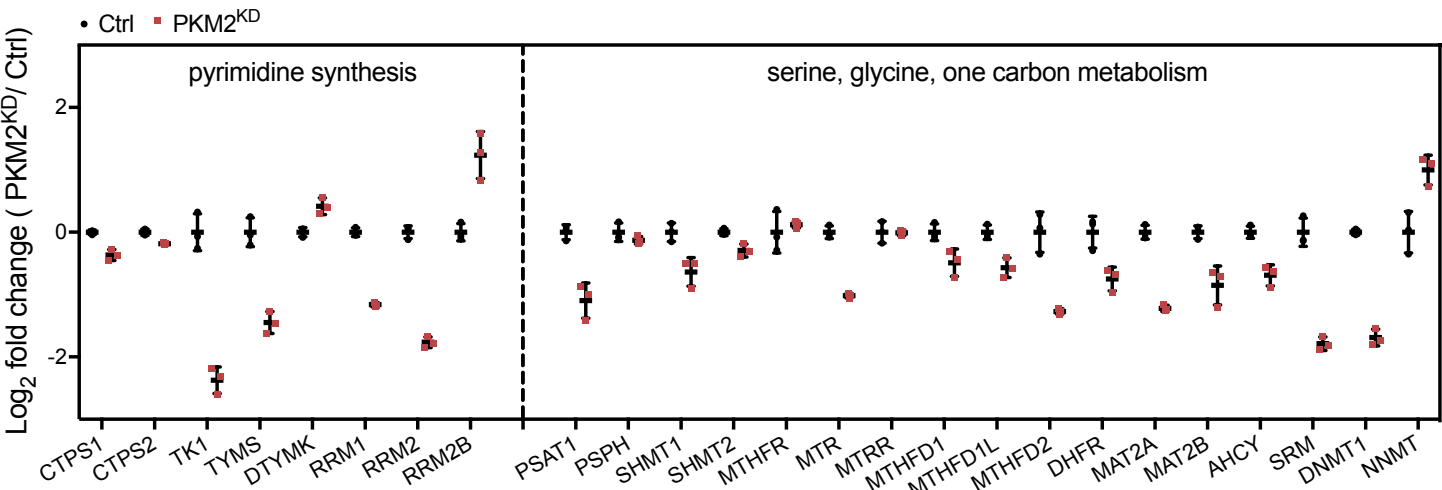

**Supplementary Figure 4: Loss of PKM2 is associated with coordinated protein expression changes.**

(a) Relative protein expression levels of enzymes in the pyrimidine synthesis and serine, glycine, one-carbon metabolism pathways in control and PKM2<sup>KD</sup> ECs (related to heatmap in Figure 4c). a data represent means ± s.d.

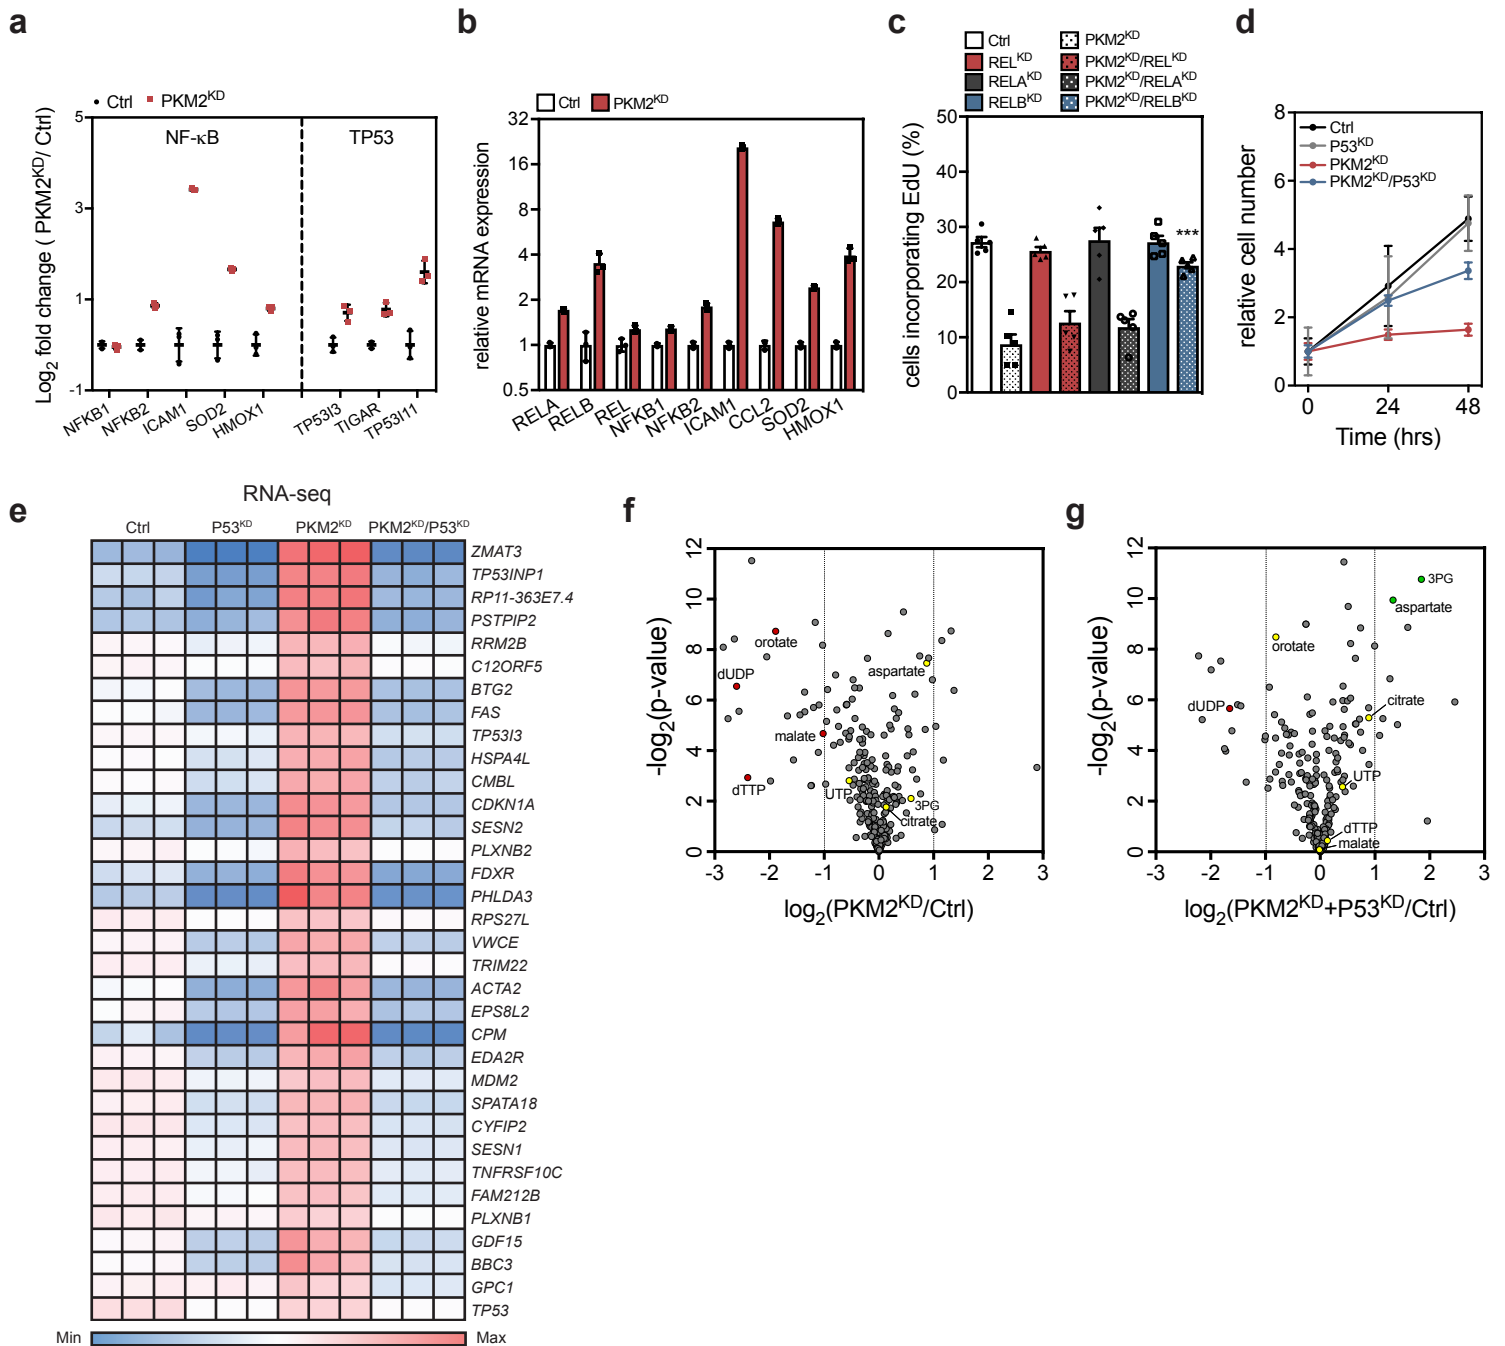

### Supplementary Figure 5: RELB-P53 signalling limits proliferation of primary endothelial cells.

(a) Relative protein expression levels of components of the NF- $\kappa$ B and P53 pathways in control and PKM2<sup>KD</sup> ECs. (b) mRNA expression levels of NF- $\kappa$ B transcription factors and selected targets in control and PKM2<sup>KD</sup> ECs (RT-qPCR, n=3). (c) EdU positive cell numbers in control, PKM2<sup>KD</sup>, REL<sup>KD</sup>, PKM2<sup>KD</sup>/REL<sup>KD</sup>, RELA<sup>KD</sup>, PKM2<sup>KD</sup>/RELA<sup>KD</sup>, RELB<sup>KD</sup> and PKM2<sup>KD</sup>/RELB<sup>KD</sup> ECs (n=6). (d) Relative cell numbers at the indicated time points in control, P53<sup>KD</sup>, PKM2<sup>KD</sup> and PKM2<sup>KD</sup>/P53<sup>KD</sup> ECs (n=6). (e) Heatmap of P53 target gene expression changes in control, P53<sup>KD</sup>, PKM2<sup>KD</sup> and PKM2<sup>KD</sup>/P53<sup>KD</sup> ECs. Metabolomics profile of (f) control vs PKM2<sup>KD</sup> and (g) control vs PKM2<sup>KD</sup>/P53<sup>KD</sup> ECs ( $\log_2$ (fold change) vs  $-\log_2$ (p-value), two tailed students t-test, n=3). **a,b** data represent means  $\pm$  s.d., **c,d** data represent means  $\pm$  s.e.m. (\*\*\*)  $P < 0.001$  by one-way analysis of variance (ANOVA) followed by Tukey's HSD test).

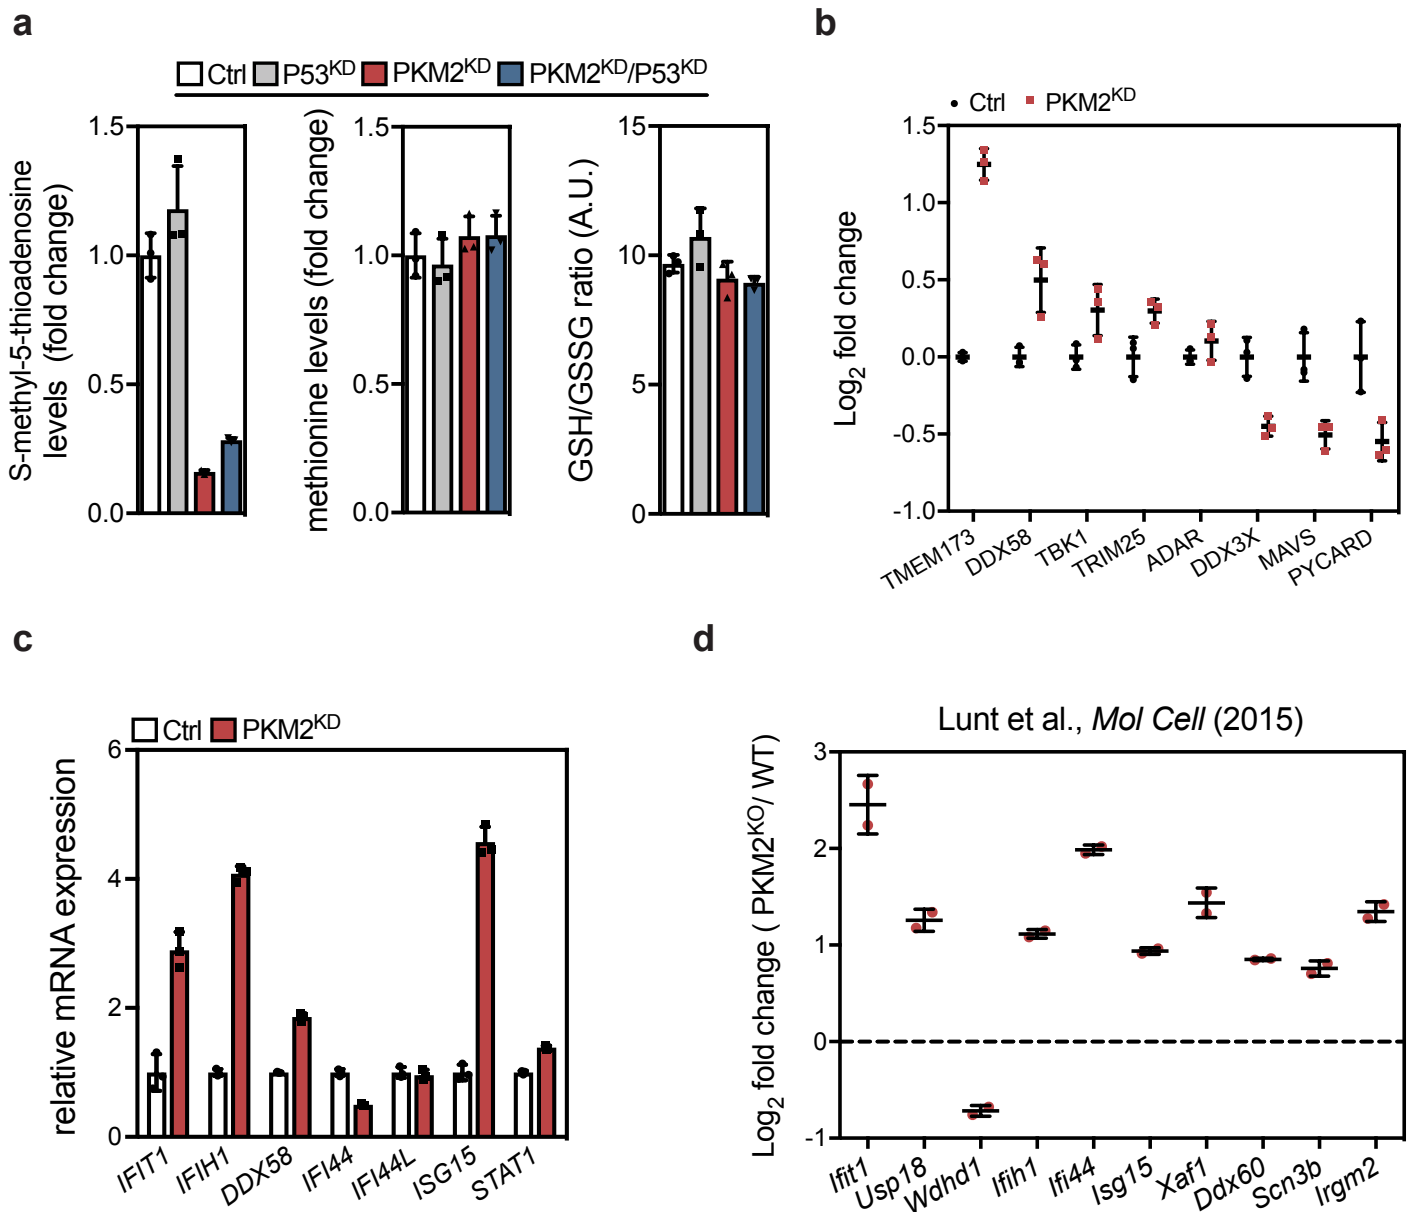

**Supplementary Figure 6: Loss of PKM2 leads to activation of innate antiviral signalling.**

(a) Relative levels of S-methyl-5-thioadenosine, methionine and GSH/GSSG ratio in control, P53<sup>KD</sup>, PKM2<sup>KD</sup> and PKM2<sup>KD</sup>/P53<sup>KD</sup> ECs (n=3). (b) Protein expression levels of viral responsive genes in control and PKM2<sup>KD</sup> ECs (n=3). (c) mRNA expression levels of interferon stimulated genes in control and PKM2<sup>KD</sup> ECs (RNA-seq analysis, n=3). (d) mRNA expression levels of the 10 most statistically significantly changed genes from wild type and *Pkm2*<sup>-/-</sup> mouse embryonic fibroblasts (microarray analysis, n=2, re-analysed from Lunt et al., 2015). a-d, data represent means ± s.d.

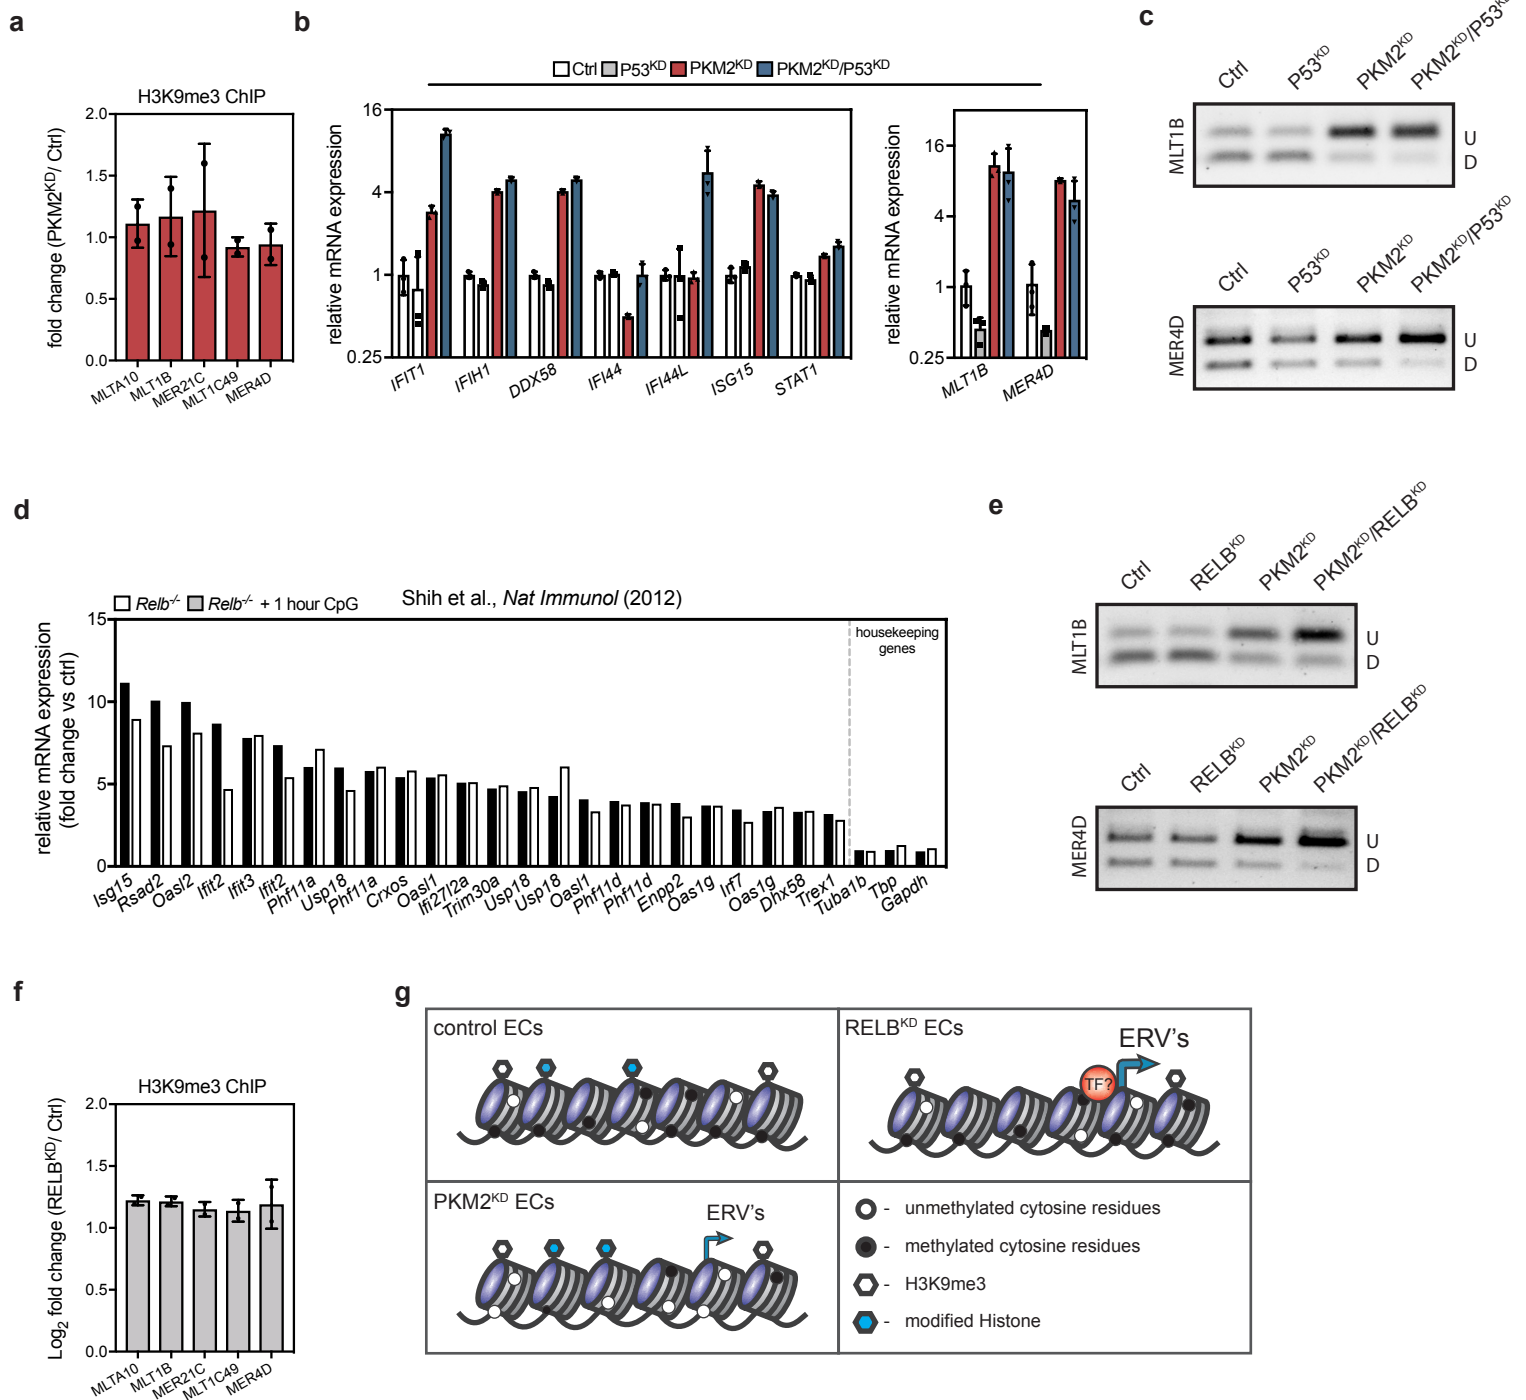

### Supplementary Figure 7: PKM2 and RELB limit endogenous retrovirus expression and innate immune signalling in endothelial cells.

(a) RT-qPCR analysis at the indicated loci of H3K9me3 chromatin immunoprecipitated DNA from control and PKM2<sup>KD</sup> ECs. (b) mRNA expression levels of interferon stimulated genes in control, P53<sup>KD</sup>, PKM2<sup>KD</sup> and PKM2<sup>KD</sup>/P53<sup>KD</sup> ECs (RNA-seq analysis, n=3) and relative mRNA expression of the indicated endogenous retroviruses in control, P53<sup>KD</sup>, PKM2<sup>KD</sup> and PKM2<sup>KD</sup>/P53<sup>KD</sup> ECs (n=3). (c) Restriction digestion of bisulfite-treated DNA amplified from the *MLT1B* and *MER4D* genomic loci from control, P53<sup>KD</sup>, PKM2<sup>KD</sup> and PKM2<sup>KD</sup>/P53<sup>KD</sup> ECs (U, undigested/unmethylated DNA; D - digested/methylated DNA). (d) Relative mRNA expression of the top 25 most regulated probes in a microarray analysis of wild-type versus *Relb*<sup>-/-</sup> dendritic cells treated with or without CpG for 1 hour (data from Shih et al., 2012). (e) Restriction digestion of bisulfite-treated DNA amplified from the *MLT1B* and *MER4D* genomic loci from control, RELB<sup>KD</sup>, PKM2<sup>KD</sup> and PKM2<sup>KD</sup>/RELB<sup>KD</sup> ECs (U, undigested/unmethylated DNA; D - digested/methylated DNA). (f) RT-qPCR analysis at the indicated loci of H3K9me3 chromatin immunoprecipitated DNA from control and RELB<sup>KD</sup> ECs. (g) Proposed model of DNA methylation and endogenous retrovirus expression changes in control, PKM2<sup>KD</sup> and RELB<sup>KD</sup> ECs. a, b and f, data represent means  $\pm$  s.d. (\*\*\*)  $P < 0.001$ , \*\*  $P < 0.01$ , \*  $P < 0.05$  by one-way analysis of variance (ANOVA) followed by Tukey's HSD test).



Figure 1b

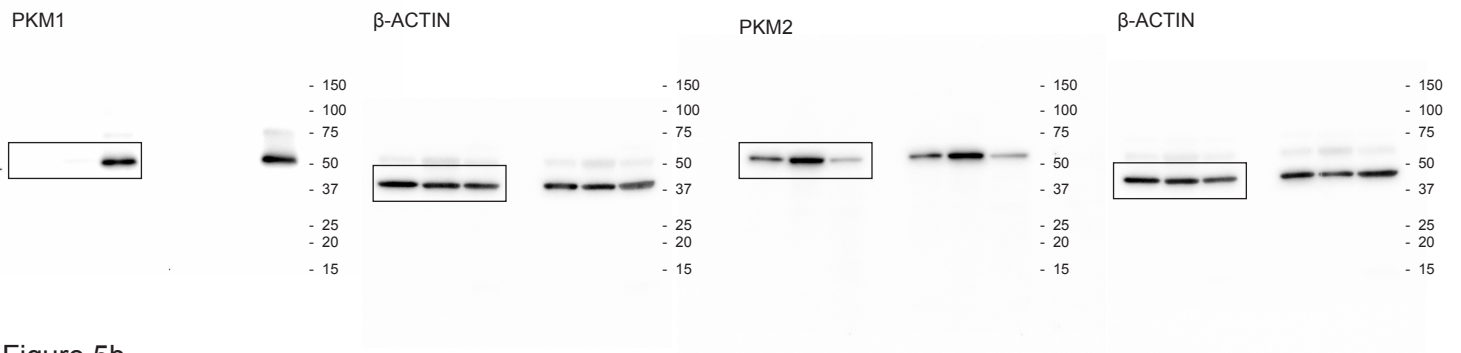

Figure 5b

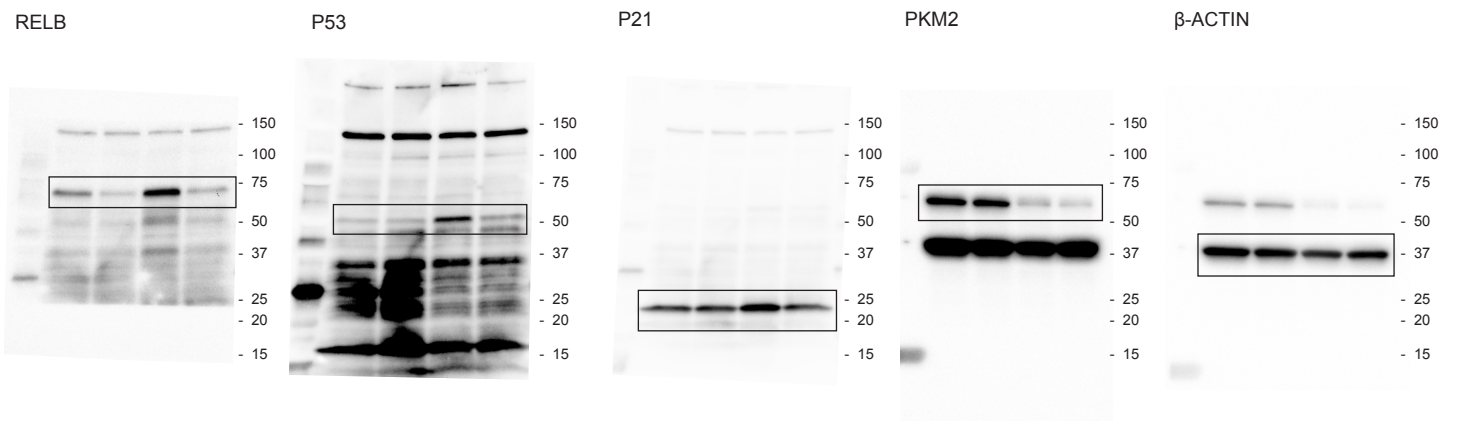

Figure 5d

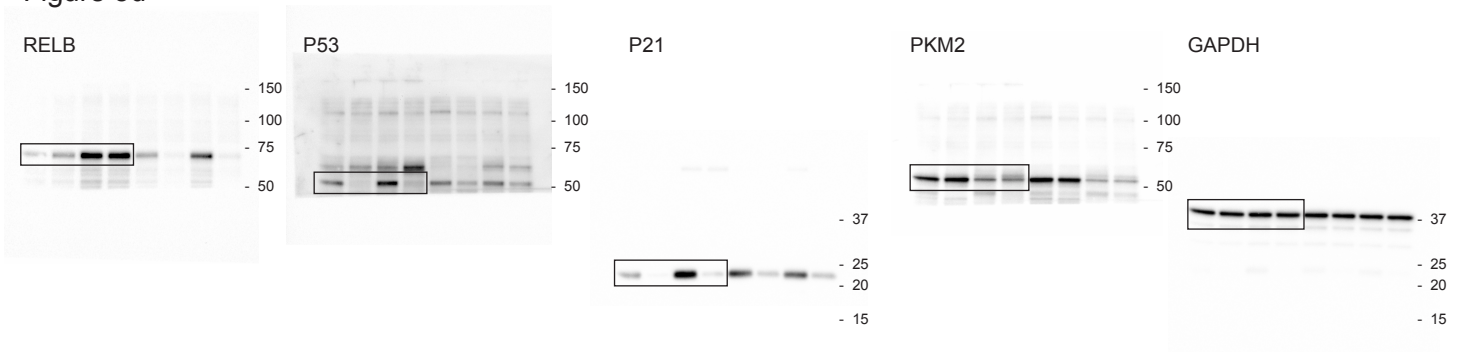

Figure 6a

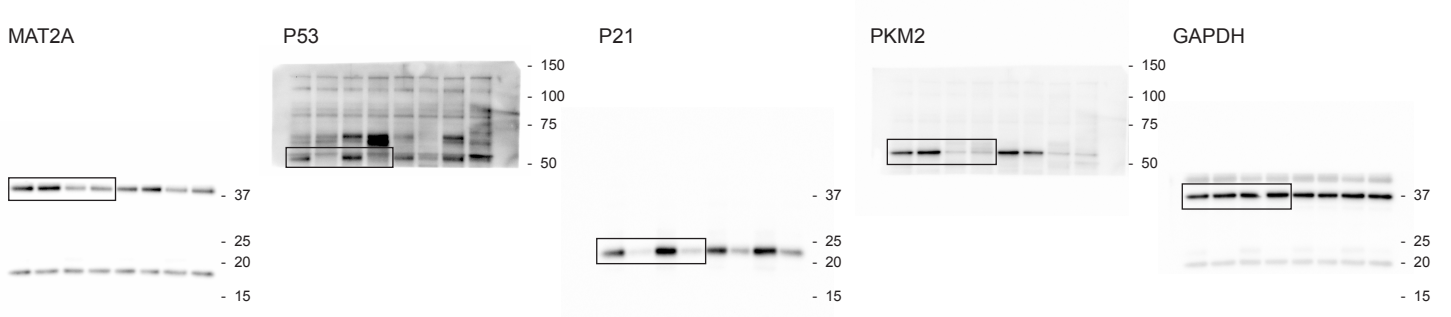

Supplementary Figure 8: Uncropped images relating to indicated Western blot data.
