# Supplementary material for: Loss of pyruvate kinase M2 limits growth and triggers innate immune signaling in endothelial cells
Source: PubMed Central journal article supplement (PMC6177464; doi:10.1038/s41467-018-06406-8), 2018-10-09
Supplement: 41467_2018_6406_MOESM2_ESM.pdf [file 41467_2018_6406_MOESM2_ESM.pdf]

## Description of Additional Supplementary Files

**File Name:** Supplementary Movie 1

**Description:** Live imaging of ISV angiogenesis in *pkma2<sup>mz</sup>/pkmb<sup>-/-</sup>* mutant zebrafish. Time-lapse confocal movie of a *Tg(kdrl:EGFP) pkma2<sup>mz</sup>/pkmb<sup>-/-</sup>* embryo between 26 and 48 hpf.

**File Name:** Supplementary Data 1

**Description:** Steady-state and [U-13C<sub>6</sub>]glucose metabolomics data for HUVEC treated with siRNAs targeting Scr/PKM2/PKM or Scr/P53/PKM2/PKM2+P53

**File Name:** Supplementary Data 2

**Description:** Proteomics data for HUVEC treated with siRNAs targeting Scr/PKM2.

**File Name:** Supplementary Data 3

**Description:** Sequences of primers used in this study
